# Supplementary material
Source: Elsevier journal article supplement (http://library.osu.edu/sites/msa/suppmat/v237.i1.pp1-10/mmc2.pdf)
Supplement: mmc2 [file mmc2.pdf]

Table S1

Optimized geometric parameters<sup>a</sup> ( Å and degree), relative energy, and rotational constants for *anti* and *syn* forms of 2-cyclohexen-1-one oxime

|                                     | <i>anti</i> form |                | <i>syn</i> form |                |
|-------------------------------------|------------------|----------------|-----------------|----------------|
|                                     | MP2/6-31G(d, p)  | HF/6-31G(d, p) | MP2/6-31G(d, p) | HF/6-31G(d, p) |
| r(C1-C2)                            | 1.504            | 1.510          | 1.504           | 1.508          |
| r(C2-C3)                            | 1.528            | 1.531          | 1.528           | 1.530          |
| r(C1-C4)                            | 1.459            | 1.473          | 1.460           | 1.475          |
| r(C1=N)                             | 1.299            | 1.260          | 1.297           | 1.259          |
| r(C3-C6)                            | 1.527            | 1.529          | 1.528           | 1.530          |
| r(C4=C7)                            | 1.347            | 1.324          | 1.349           | 1.325          |
| r(N-O)                              | 1.414            | 1.375          | 1.478           | 1.377          |
| r(C2-H9)                            | 1.095            | 1.089          | 1.095           | 1.089          |
| r(C2-H10)                           | 1.089            | 1.081          | 1.090           | 1.083          |
| r(C3-H11)                           | 1.091            | 1.086          | 1.091           | 1.086          |
| r(C3-H12)                           | 1.093            | 1.087          | 1.093           | 1.087          |
| r(C4-H13)                           | 1.083            | 1.075          | 1.080           | 1.072          |
| r(C6-H14)                           | 1.096            | 1.090          | 1.096           | 1.090          |
| r(C6-H15)                           | 1.092            | 1.086          | 1.093           | 1.087          |
| r(C7-H16)                           | 1.084            | 1.077          | 1.085           | 1.078          |
| r(O-H17)                            | 0.966            | 0.942          | 0.966           | 0.942          |
| ∠C3-C2-C1                           | 110.54           | 111.12         | 109.46          | 110.40         |
| ∠C4-C1-C2                           | 118.84           | 117.78         | 117.50          | 116.80         |
| ∠C2-C1-N                            | 125.46           | 125.86         | 116.54          | 117.48         |
| ∠C6-C3-C2                           | 111.32           | 111.91         | 110.26          | 110.80         |
| ∠C7-C4-C1                           | 121.62           | 122.13         | 120.67          | 121.02         |
| ∠O-N-C1                             | 110.84           | 113.09         | 111.22          | 113.26         |
| ∠H9-C2-C1                           | 108.53           | 107.77         | 109.15          | 108.43         |
| ∠H10-C2-C1                          | 109.43           | 109.85         | 109.36          | 109.33         |
| ∠H11-C3-C2                          | 110.03           | 109.67         | 110.59          | 110.23         |
| ∠H12-C3-C2                          | 108.85           | 109.00         | 108.95          | 109.16         |
| ∠H13-C4-C1                          | 116.93           | 116.35         | 118.31          | 117.88         |
| ∠H14-C6-C3                          | 109.88           | 110.35         | 109.83          | 110.24         |
| ∠H15-C6-C3                          | 110.23           | 110.10         | 110.42          | 110.35         |
| ∠H16-C7-C4                          | 119.35           | 119.25         | 119.02          | 118.88         |
| ∠H17-O-N                            | 101.10           | 103.97         | 100.96          | 103.88         |
| ∠C4-C1-C2-C3                        | -28.89           | -30.41         | -40.38          | -39.58         |
| ∠N-C1-C2-C3                         | 153.44           | 151.93         | 140.43          | 141.48         |
| ∠C6-C3-C2-C1                        | 54.47            | 53.30          | 59.27           | 57.14          |
| ∠C7-C4-C1-C2                        | 0.35             | 2.64           | 9.82            | 10.26          |
| ∠O-N-C1-C2                          | -0.15            | -0.64          | 179.54          | 178.97         |
| ∠H7-C2-C1-C4                        | 91.84            | 90.14          | 78.88           | 80.08          |
| ∠H10-C2-C1-C4                       | -152.06          | -153.77        | -163.56         | -162.95        |
| ∠H11-C3-C2-C1                       | 177.47           | 176.10         | 181.73          | 179.44         |
| ∠H12-C3-C2-C1                       | -65.32           | -67.14         | -60.53          | -63.22         |
| ∠H13-C4-C1-C2                       | 181.87           | 184.16         | 190.18          | 190.67         |
| ∠H14-C6-C3-C2                       | 69.65            | 73.04          | 73.25           | 75.60          |
| ∠H15-C6-C3-C2                       | -173.75          | -170.21        | -170.28         | -167.69        |
| ∠H16-C7-C4-C1                       | 182.76           | 182.56         | 182.27          | 181.78         |
| ∠H17-O-N-C1                         | -178.11          | -178.80        | -178.94         | -179.59        |
| <br>                                |                  |                |                 |                |
| A/MHz                               | 4424.43          | 4447.04        | 4362.08         | 4386.45        |
| B/MHz                               | 1509.03          | 1519.57        | 1511.75         | 1526.14        |
| C/MHz                               | 1169.18          | 1175.24        | 1178.56         | 1186.39        |
| $\Delta I^b / \text{u}\text{\AA}^2$ | -16.878          | -16.204        | -21.346         | -20.384        |
| $\Delta E^c / \text{kJmol}^{-1}$    | 0.00             | 0.00           | 1.51            | 1.84           |

<sup>a</sup> See Fig. 1 for the numbering of the atoms.

<sup>b</sup>  $\Delta I = I_c - I_a - I_b$

<sup>c</sup> Relative energy
